# Supplementary material for: Structural Variation of Bamboo Lignin before and after Ethanol Organosolv Pretreatment
Source: PubMed Central journal article supplement (PMC3856011; doi:10.3390/ijms141121394), 2013-10-28
Supplement: ijms-14-21394-s001.pdf [file ijms-14-21394-s001.pdf]

## Supplementary Information

**Table S1.** Assignments of the FT-IR spectra of the lignin samples.

| Assignments                                                                                                     | Wavenumbers (cm <sup>-1</sup> ) |
|-----------------------------------------------------------------------------------------------------------------|---------------------------------|
| O–H stretch                                                                                                     | 3401                            |
| C–H stretch in methyl and methylene groups                                                                      | 2939                            |
| C=O stretch in unconjugated ketones, carbonyl and in ester groups (frequently of carbohydrate origin)           | 1705                            |
| C=O stretch; in conjugated <i>p</i> -substituted aryl ketones                                                   | 1655                            |
| aromatic skeletal vibrations; S > G                                                                             | 1593                            |
| C-H deformations; asym. in –CH <sub>3</sub> and –CH <sub>2</sub> –                                              | 1504                            |
| Aromatic skeletal vibrations combined with C-H in-plane deform                                                  | 1423                            |
| Aliphatic C-H stretch in CH <sub>3</sub> , not in OMe; phen.OH                                                  | 1362                            |
| condensed S and G rings (substituted in one of the positions in the ring)                                       | 1327                            |
| G ring plus C=O stretch                                                                                         | 1261                            |
| Typical for HGS lignins; C=O in ester groups (conjugated)                                                       | 1161                            |
| Aromatic C-H in-plane deformation                                                                               | 1122                            |
| Aromatic C-H in-plane deformation, G > S; plus C-O deform, in primary alcohols; plus C=O stretch (unconjugated) | 1030                            |
| C-H out-of-plane in positions 2, 5, and 6 of G units                                                            | 833                             |

© 2013 by the authors; licensee MDPI, Basel, Switzerland. This article is an open access article distributed under the terms and conditions of the Creative Commons Attribution license (<http://creativecommons.org/licenses/by/3.0/>).
